# Supplementary material
Source: PubMed Central journal article supplement (PMC3862459)
Supplement: 113.066720_ajcn066720SupplementaryData2.pdf [file 113.066720_ajcn066720SupplementaryData2.pdf]

## Online Supplemental Material

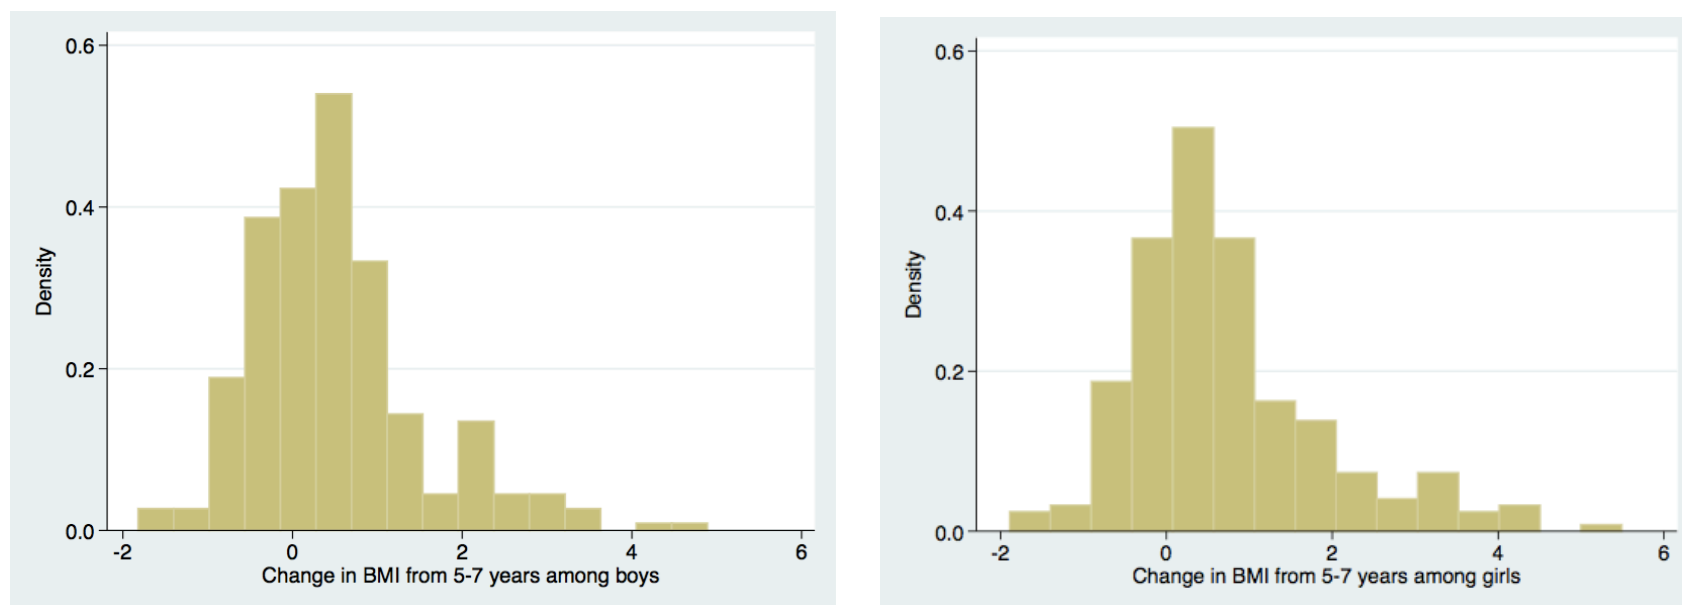

**Supplemental Figure 2.** Change in BMI from 5-7 years of age among boys (N=265) and girls (N=250)
