# Supplementary material
Source: PubMed Central journal article supplement (PMC3862459)
Supplement: 113.066720_ajcn066720SupplementaryData3.pdf [file 113.066720_ajcn066720SupplementaryData3.pdf]

## Online Supplemental Material

**Supplemental Table 1.** Pairwise correlations between PCB, DDE and child and maternal characteristics among **girls**. (N=271)

|                              | Correlation Coefficient (r) <sup>1</sup> |              |                 |                 |         |              |       |                              |
|------------------------------|------------------------------------------|--------------|-----------------|-----------------|---------|--------------|-------|------------------------------|
|                              | PCBs                                     | DDE          | Maternal BMI    | BMI 5 Y         | BMI 7 Y | Birth weight | SES   | Maternal alcohol consumption |
| PCBs                         | 1.00                                     |              |                 |                 |         |              |       |                              |
| DDE                          | <b>0.88****</b>                          | 1.00         |                 |                 |         |              |       |                              |
| Maternal BMI                 | -0.01                                    | 0.09         | 1.00            |                 |         |              |       |                              |
| BMI 5 Y                      | -0.05                                    | -0.04        | <b>0.22****</b> | 1.00            |         |              |       |                              |
| BMI 7 Y                      | 0.05                                     | 0.06         | <b>0.24****</b> | <b>0.84****</b> | 1.00    |              |       |                              |
| Birth weight                 | 0.02                                     | 0.00         | <b>0.15**</b>   | <b>0.17**</b>   | 0.10    | 1.00         |       |                              |
| SES                          | 0.09                                     | <b>0.12*</b> | -0.07           | -0.04           | -0.09   | 0.04         | 1.00  |                              |
| Maternal alcohol consumption | 0.06                                     | 0.02         | 0.10            | 0.05            | 0.01    | 0.05         | -0.08 | 1.00                         |

<sup>1</sup> Spearman's rank correlation coefficients

\*p≤0.05, \*\*p≤0.01, \*\*\*p≤0.005, \*\*\*\*p≤0.001 of significance
