# Supplementary material
Source: PubMed Central journal article supplement (PMC3862459)
Supplement: 113.066720_ajcn066720SupplementaryData4.pdf [file 113.066720_ajcn066720SupplementaryData4.pdf]

## Online Supplemental Material

**Supplemental Table 2.** Pairwise correlations between PCB, DDE and child and maternal characteristics among **boys**. (N=288)

|                              | Correlation Coefficient (r) <sup>1</sup> |                 |                 |                 |               |              |                  |                              |
|------------------------------|------------------------------------------|-----------------|-----------------|-----------------|---------------|--------------|------------------|------------------------------|
|                              | PCBs                                     | DDE             | Maternal BMI    | BMI 5 Y         | BMI 7 Y       | Birth weight | SES              | Maternal alcohol consumption |
| PCBs                         | 1.00                                     |                 |                 |                 |               |              |                  |                              |
| DDE                          | <b>0.92****</b>                          | 1.00            |                 |                 |               |              |                  |                              |
| Maternal BMI                 | <b>0.12*</b>                             | <b>0.20****</b> | 1.00            |                 |               |              |                  |                              |
| BMI 5 Y                      | -0.03                                    | -0.05           | <b>0.19****</b> | 1.00            |               |              |                  |                              |
| BMI 7 Y                      | -0.08                                    | -0.11           | <b>0.21****</b> | <b>0.81****</b> | 1.00          |              |                  |                              |
| Birth weight                 | -0.01                                    | 0.04            | 0.09            | <b>0.21****</b> | <b>0.15**</b> | 1.00         |                  |                              |
| SES                          | 0.06                                     | 0.06            | -0.10           | <b>-0.12*</b>   | <b>-0.12*</b> | 0.05         | 1.00             |                              |
| Maternal alcohol consumption | -0.02                                    | -0.02           | <b>0.11*</b>    | 0.03            | 0.07          | 0.02         | <b>-0.21****</b> | 1.00                         |

<sup>1</sup> Spearman's rank correlation coefficients

\*p≤0.05, \*\*p≤0.01, \*\*\*p≤0.005, \*\*\*\*p≤0.001 of significance
