# Supplementary material
Source: PubMed Central journal article supplement (PMC3862459)

# Online Supplemental Material

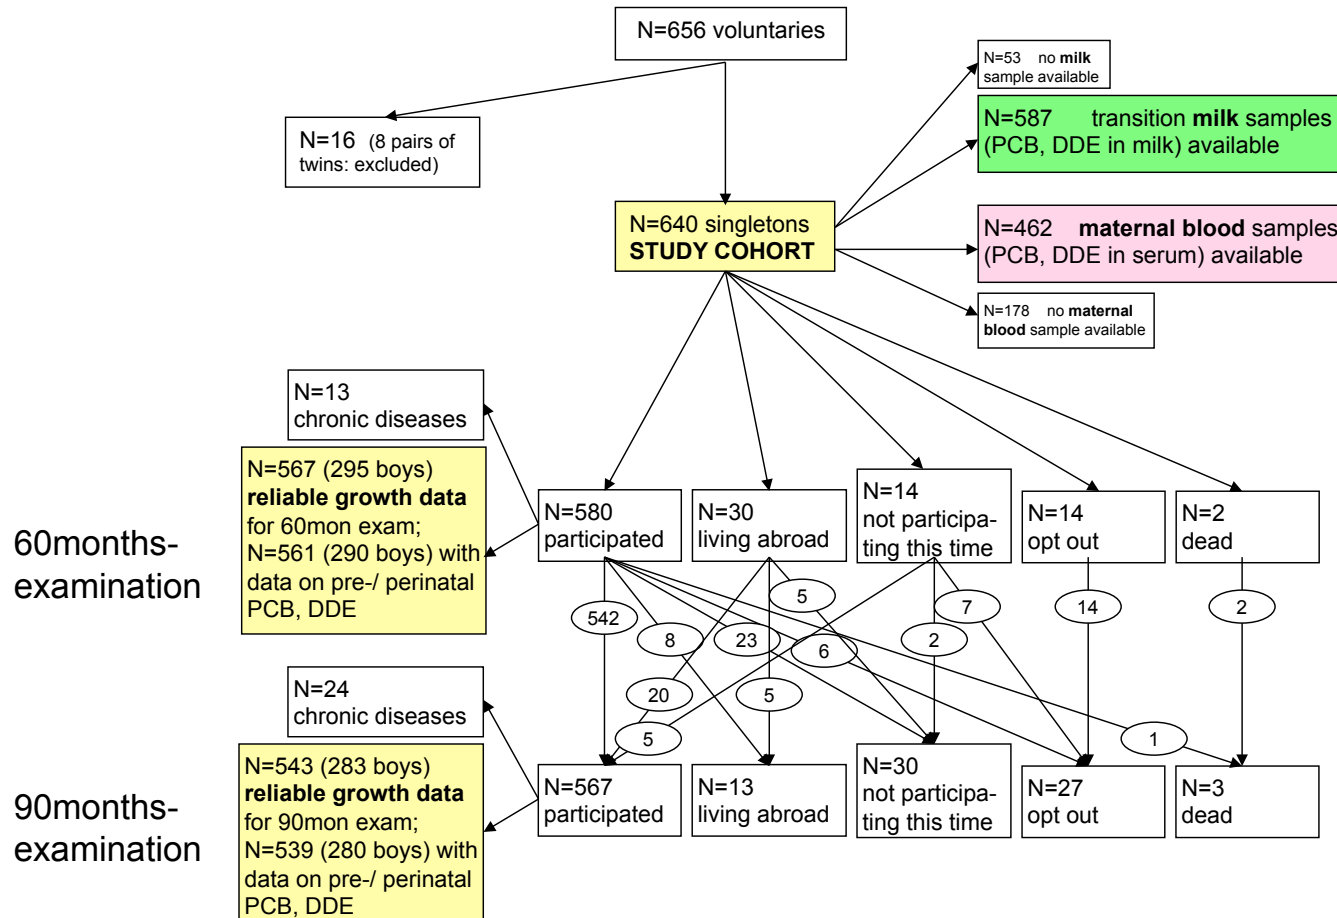

Supplemental Figure 1. Flowchart, Faroese Cohort 1996-2001

Supplement: 113.066720_ajcn066720SupplementaryData1.pdf [file 113.066720_ajcn066720SupplementaryData1.pdf]
